# Supplementary material
Source: PubMed Central journal article supplement (PMC4618797)

Figure S1

A

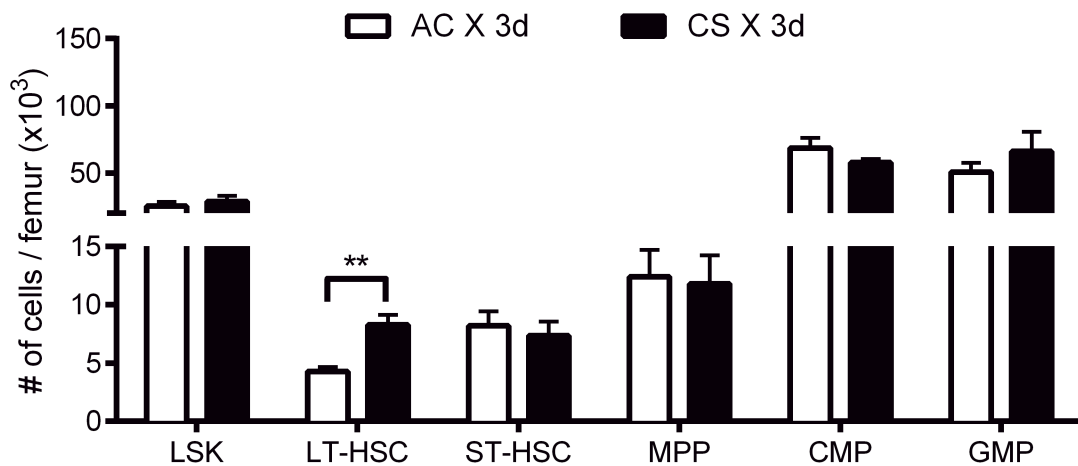

B

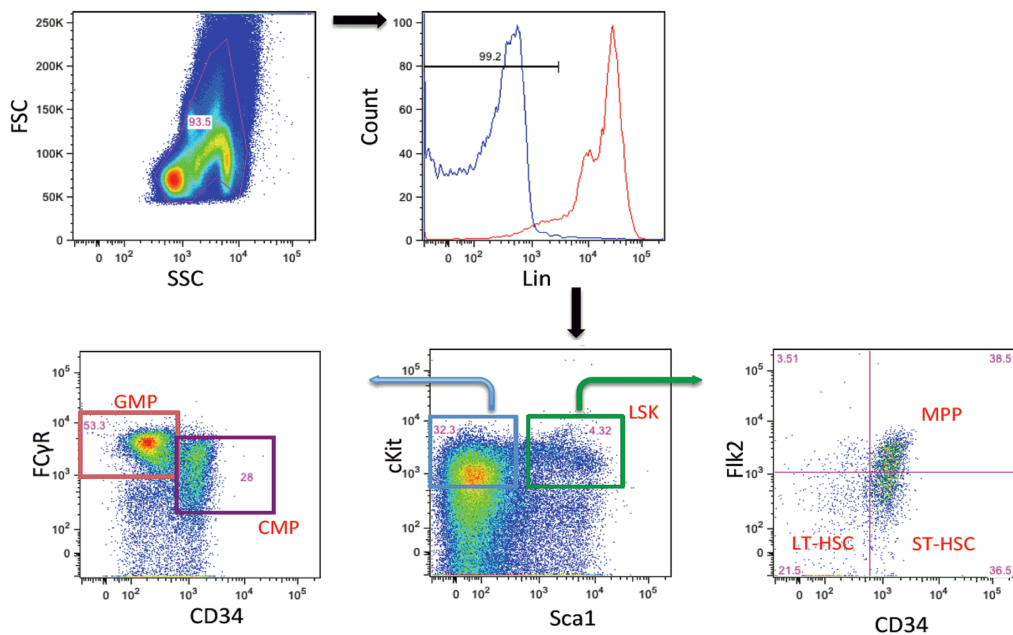

Figure S2

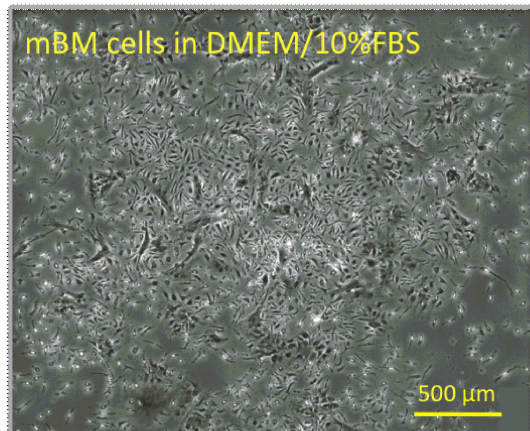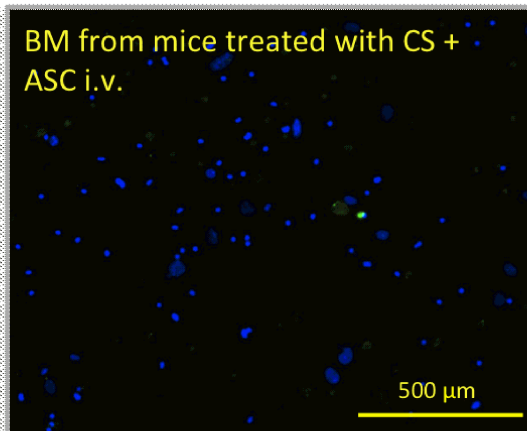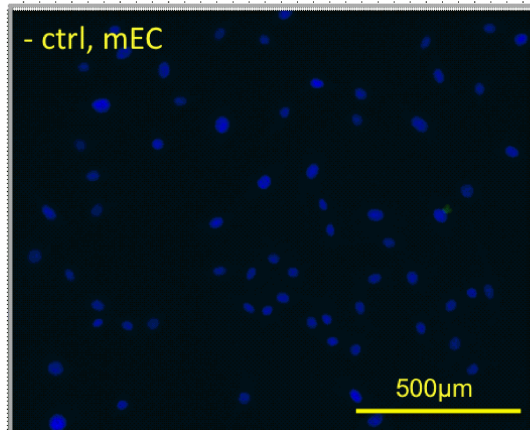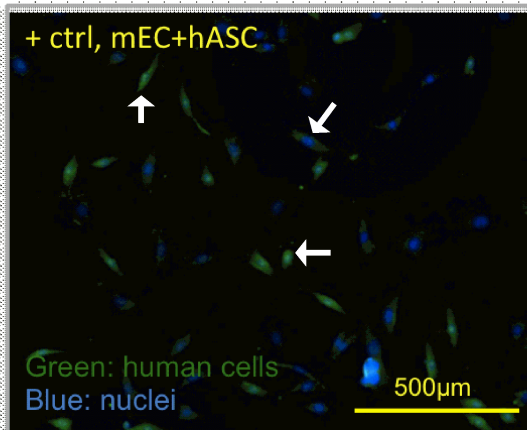

Figure S3

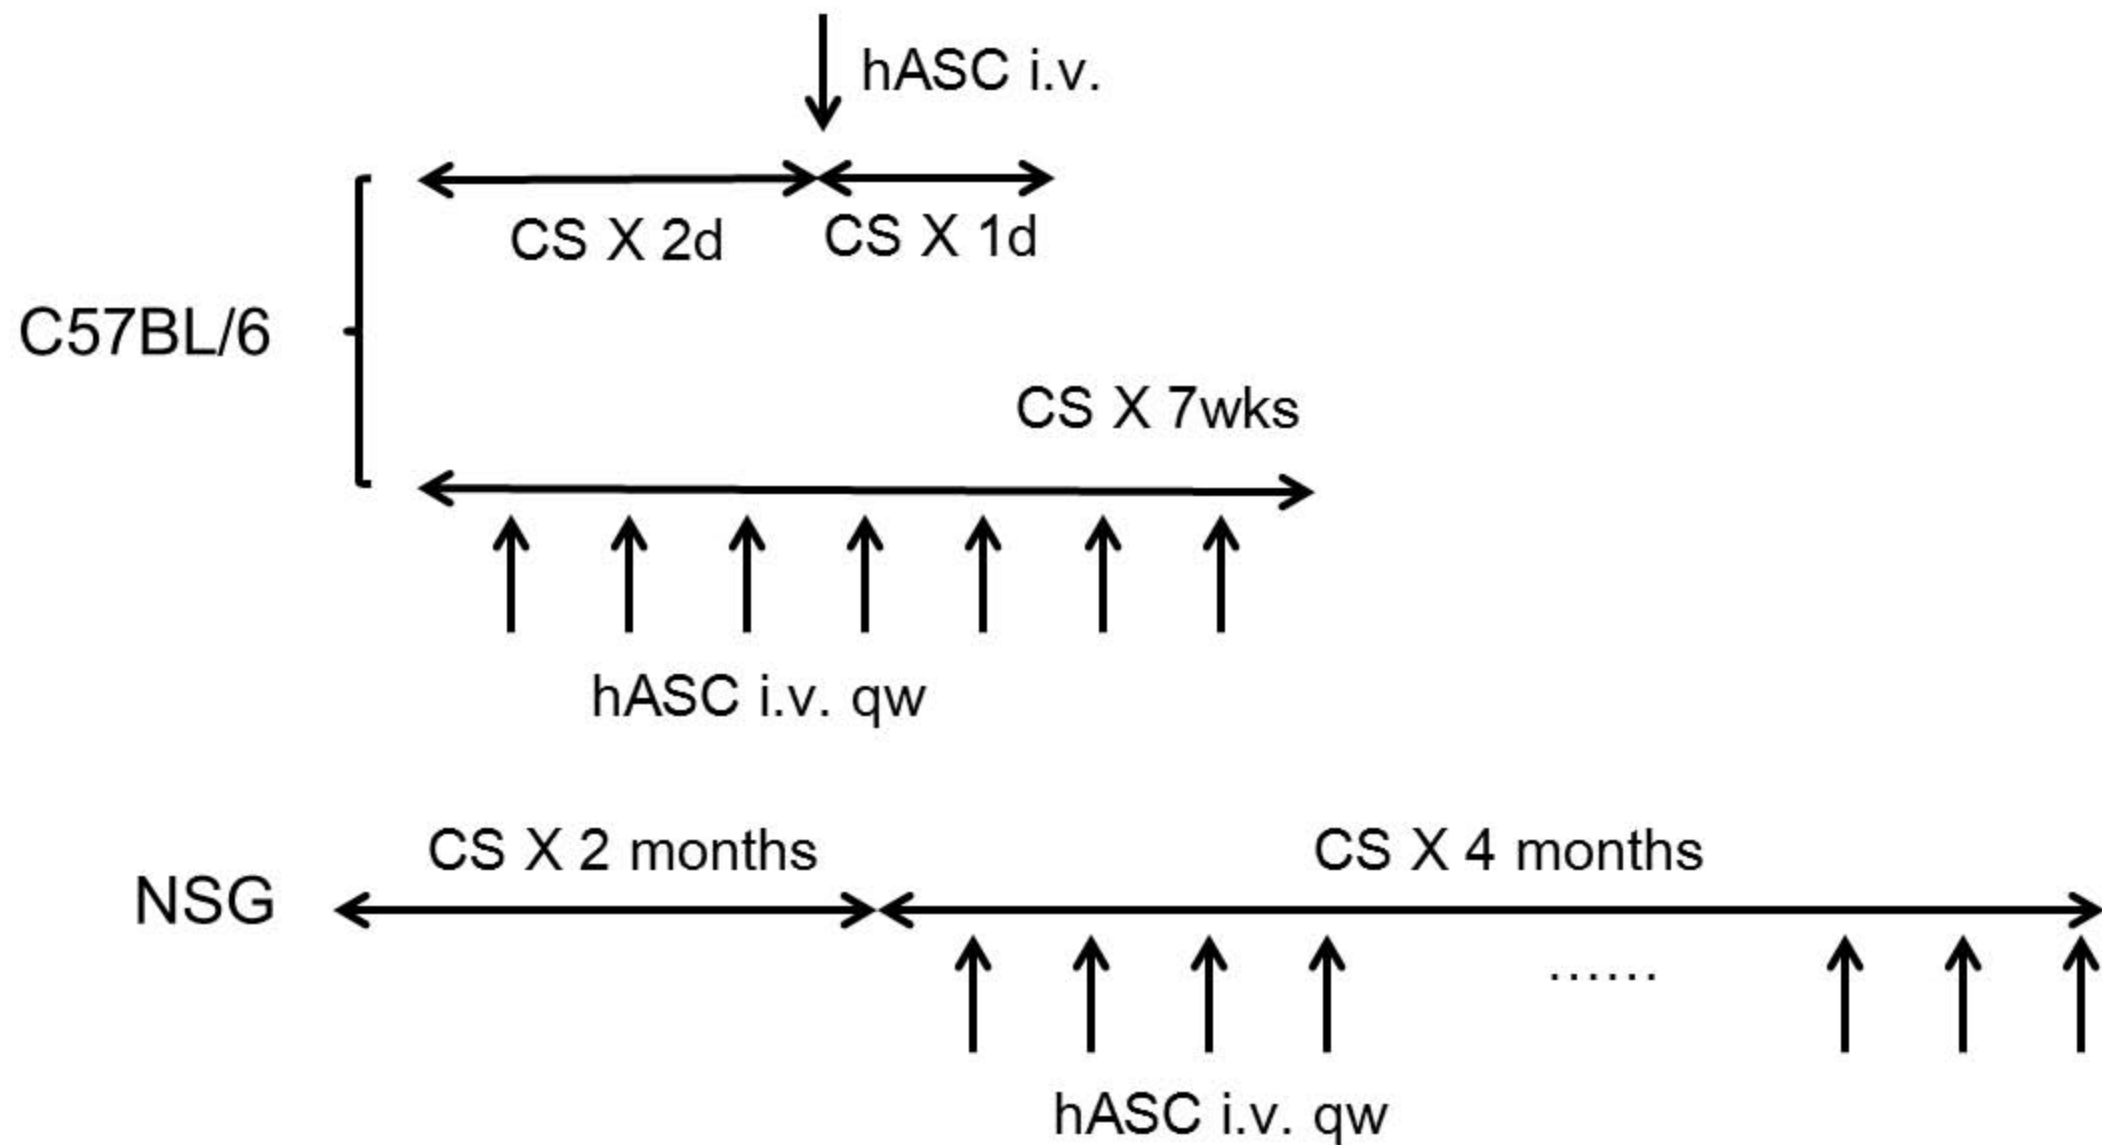

Figure S4

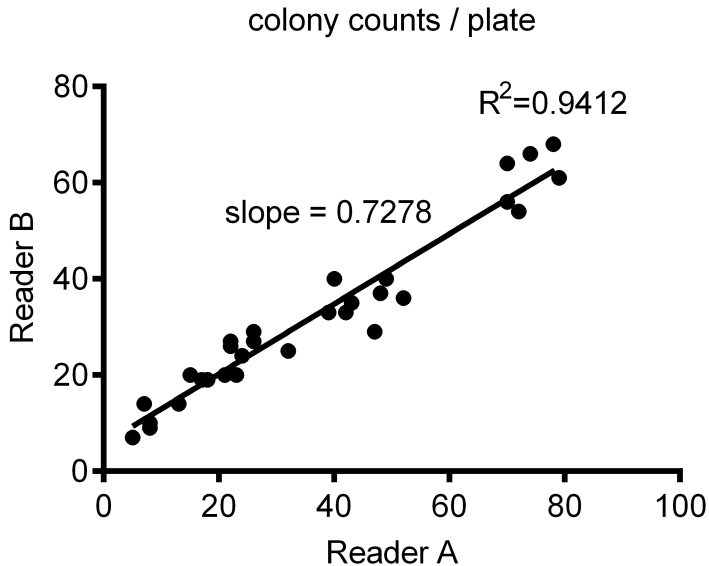

Figure S5

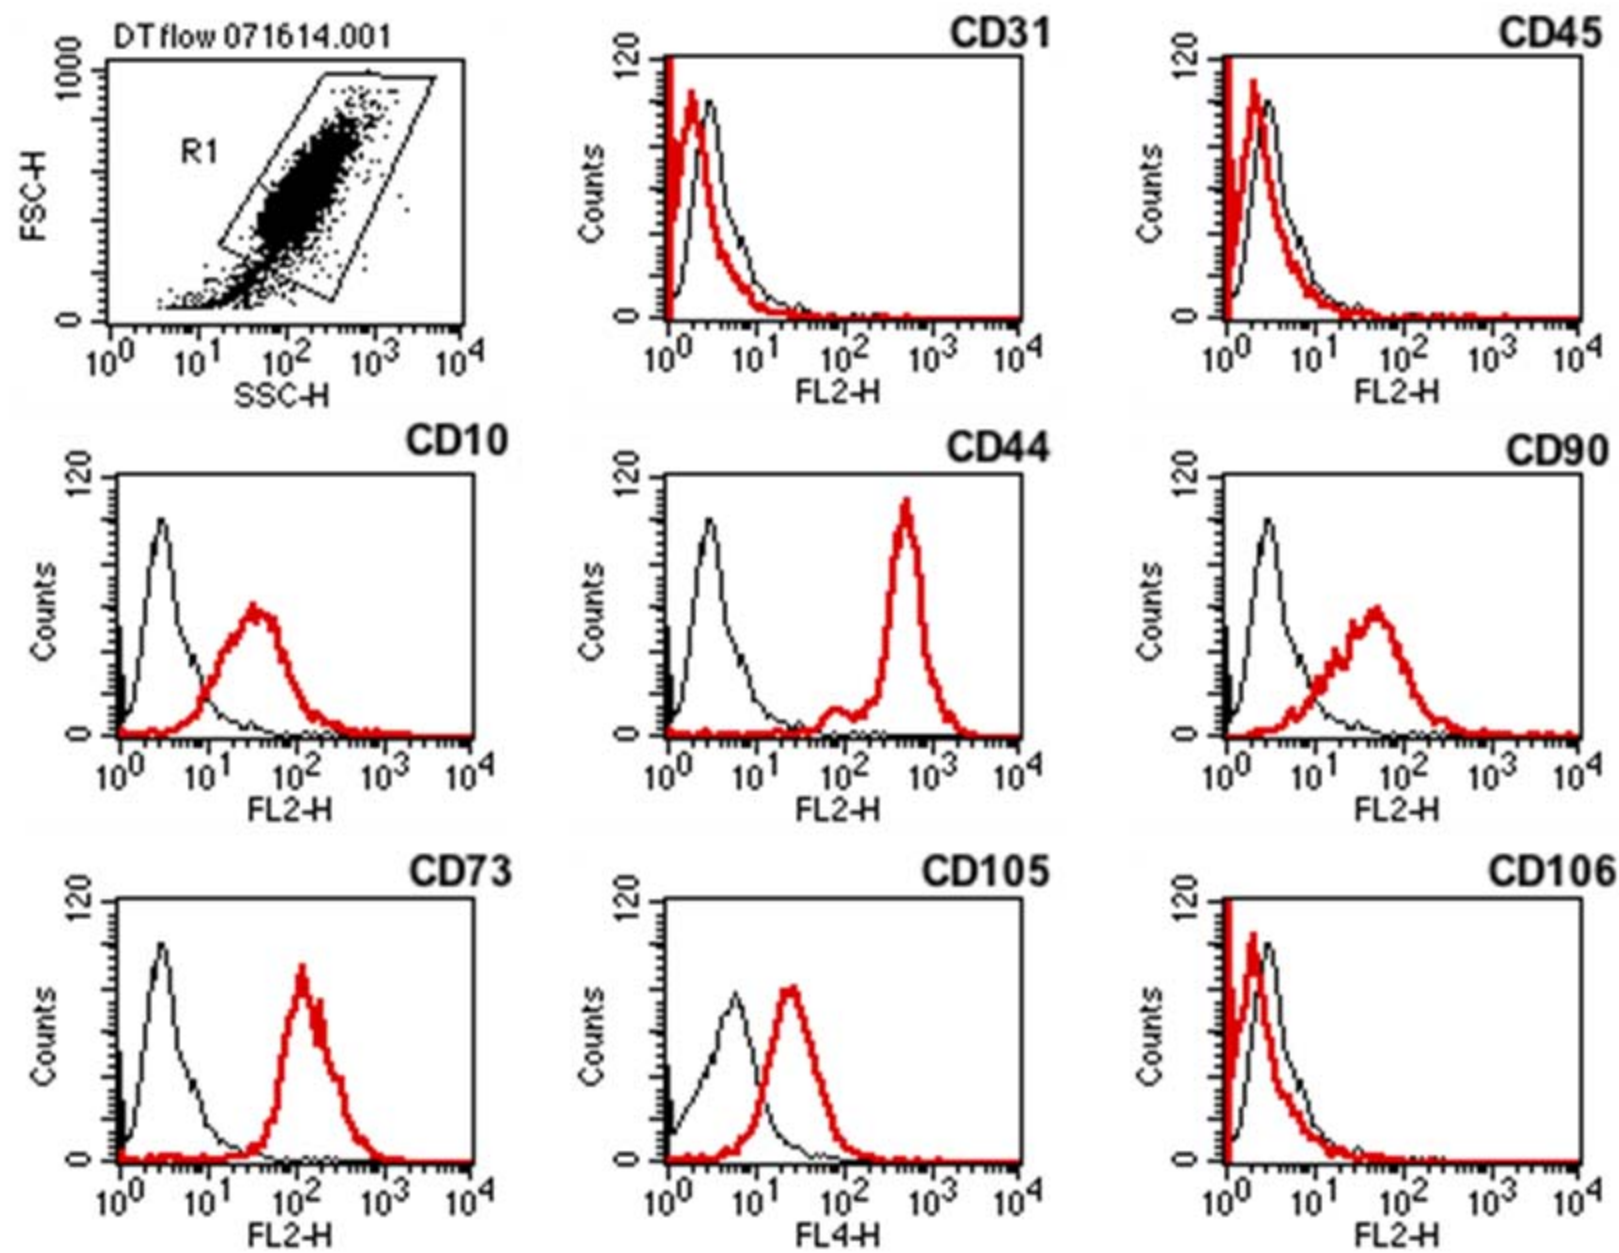

Figure S6

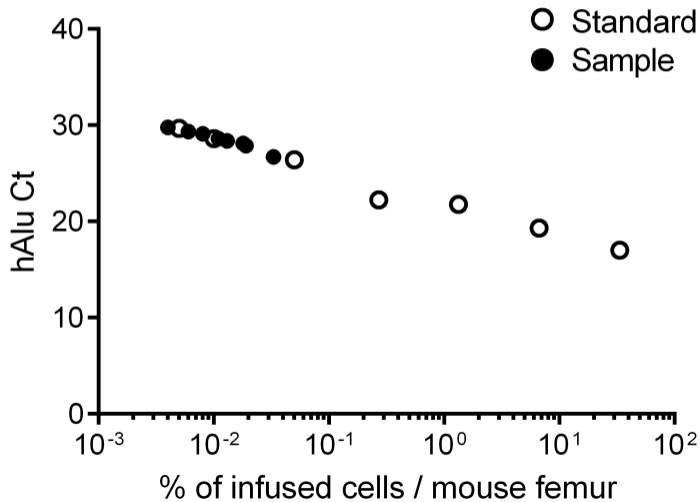

Figure S7

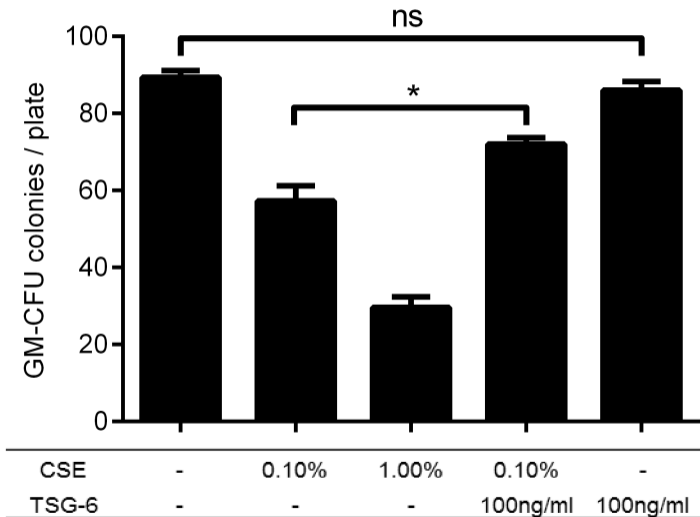

Supplement: NIHMS631762-supplement-Supp_FigureS1-S7.pdf [file NIHMS631762-supplement-Supp_FigureS1-S7.pdf]
